# Supplementary material
Source: publisher figshare collection journal article supplement (https://acs.figshare.com/ndownloader/files/4468102)
Supplement: Supplementary file 1 [file 4468102]

## **Effects of Hydrophobicity and Electrostatic Charge on Complement Activation by Amino Groups**

Mitsuaki TODA<sup>1,2</sup>, Hiroo IWATA<sup>2,\*</sup>

<sup>1</sup>*Advanced Software Technology & Mechatronics Research Institute of Kyoto,  
134 Minamimachi Chudoji, Shimogyo-ku, Kyoto 600-8813, Japan*

<sup>2</sup>*Institute for Frontier Medical Sciences, Kyoto University,  
53 Kawahara-cho, Shogoin, Sakyo-ku, Kyoto 606-8507, Japan*

\*To whom correspondence should be addressed:

Professor Hiroo Iwata, Institute for Frontier Medical Sciences, Kyoto University, 53 Kawahara-cho, Shogoin, Sakyo-ku, Kyoto 606-8507, Japan.

Tel & Fax: +81-75-751-4119. E-mail: iwata@frontier.kyoto-u.ac.jp.

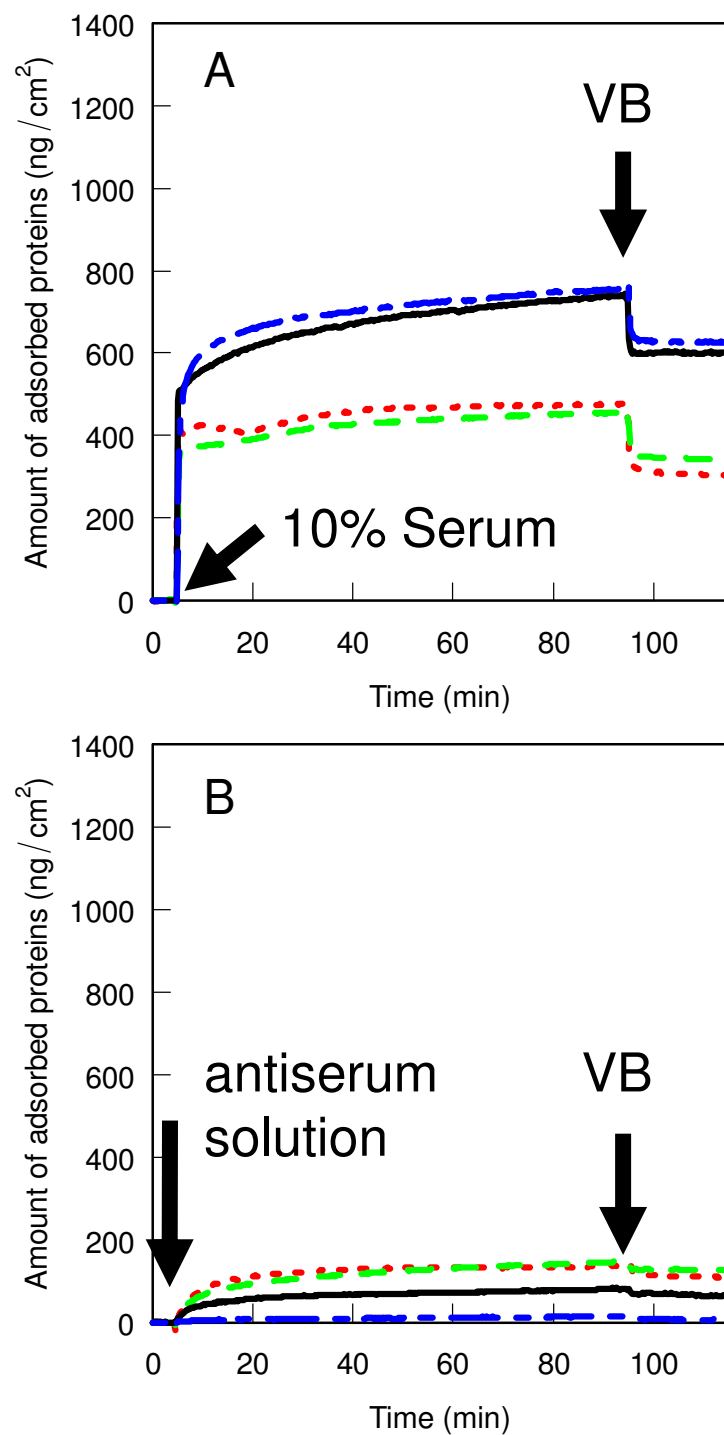

**Figure S1.** SPR sensorgrams during exposure of 10% NHS (A) and 1% anti-C3b antiserum (B) to a series of NH<sub>2</sub>/CH<sub>3</sub> mixed SAM surfaces. (colored edition) : ( · · · · ) NH<sub>2</sub>/CH<sub>3</sub>=0/100, ( - - - ) NH<sub>2</sub>/CH<sub>3</sub>=45/55, ( — ) NH<sub>2</sub>/CH<sub>3</sub>=100/0, ( - - - ) NH<sub>2</sub>/CH<sub>3</sub>=100/0 with 10 mM EDTA supplemented 10% NHS.

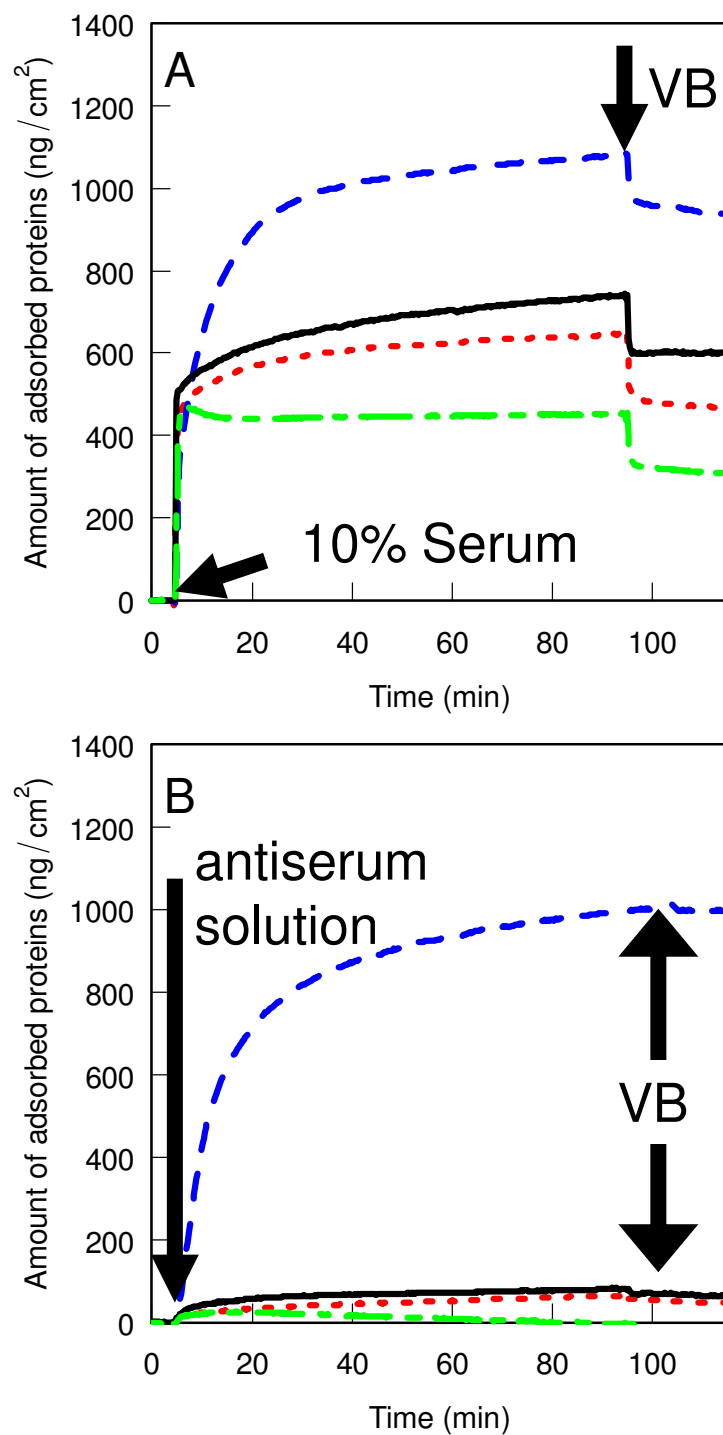

**Figure S2.** SPR sensorgrams during exposure of 10% NHS (A) and 1% anti-C3b antiserum (B) to a series of NH<sub>2</sub>/COOH mixed SAM surfaces. (colored edition) : ( . . . . ) NH<sub>2</sub>/COOH=0/100, ( - - - ), NH<sub>2</sub>/COOH=55/45, ( — ) NH<sub>2</sub> 100%, and ( - - - ) NH<sub>2</sub>/COOH=55/45 with 10 mM EDTA supplemented 10% NHS. NH<sub>2</sub> 100% was the same as for Figure 2. Error bars represent  $\pm$  SEM (n=3).

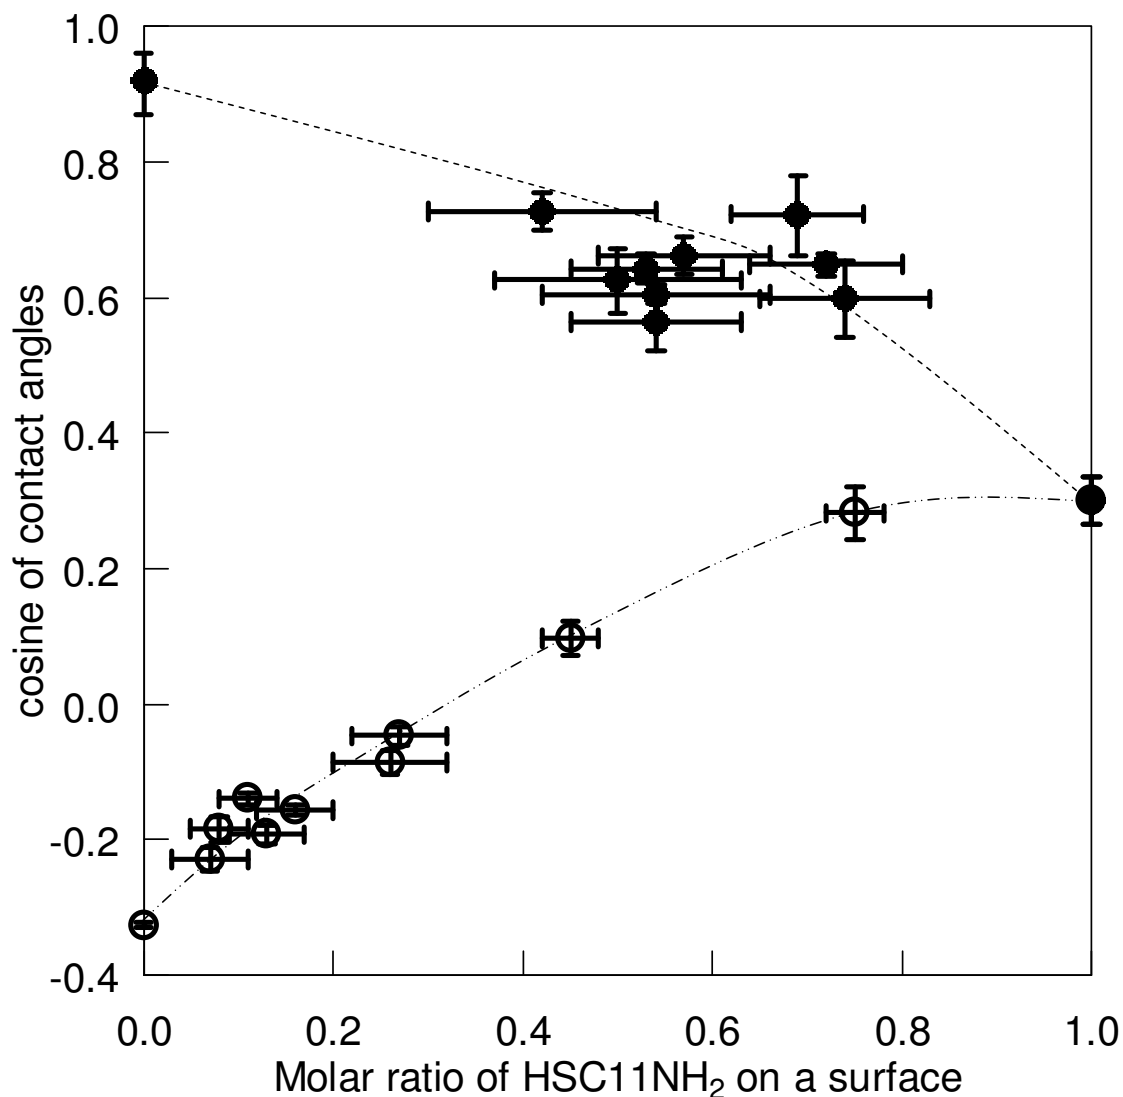

**Figure S3.** Cosine of contact angles of two series of mixed SAMs, amino/methyl or amino/carboxy terminated alkanethiols, with different densities of surface amino groups. (○): Mixed SAMs of 11-amino-1-undecanethiol (NH<sub>2</sub>) and 1-Dodecanethiol. (●): Mixed SAMs of 11-amino-1-undecanethiol (NH<sub>2</sub>) and 11-mercaptopundecanoic acid. Error bars represent ± SEM (n=3).

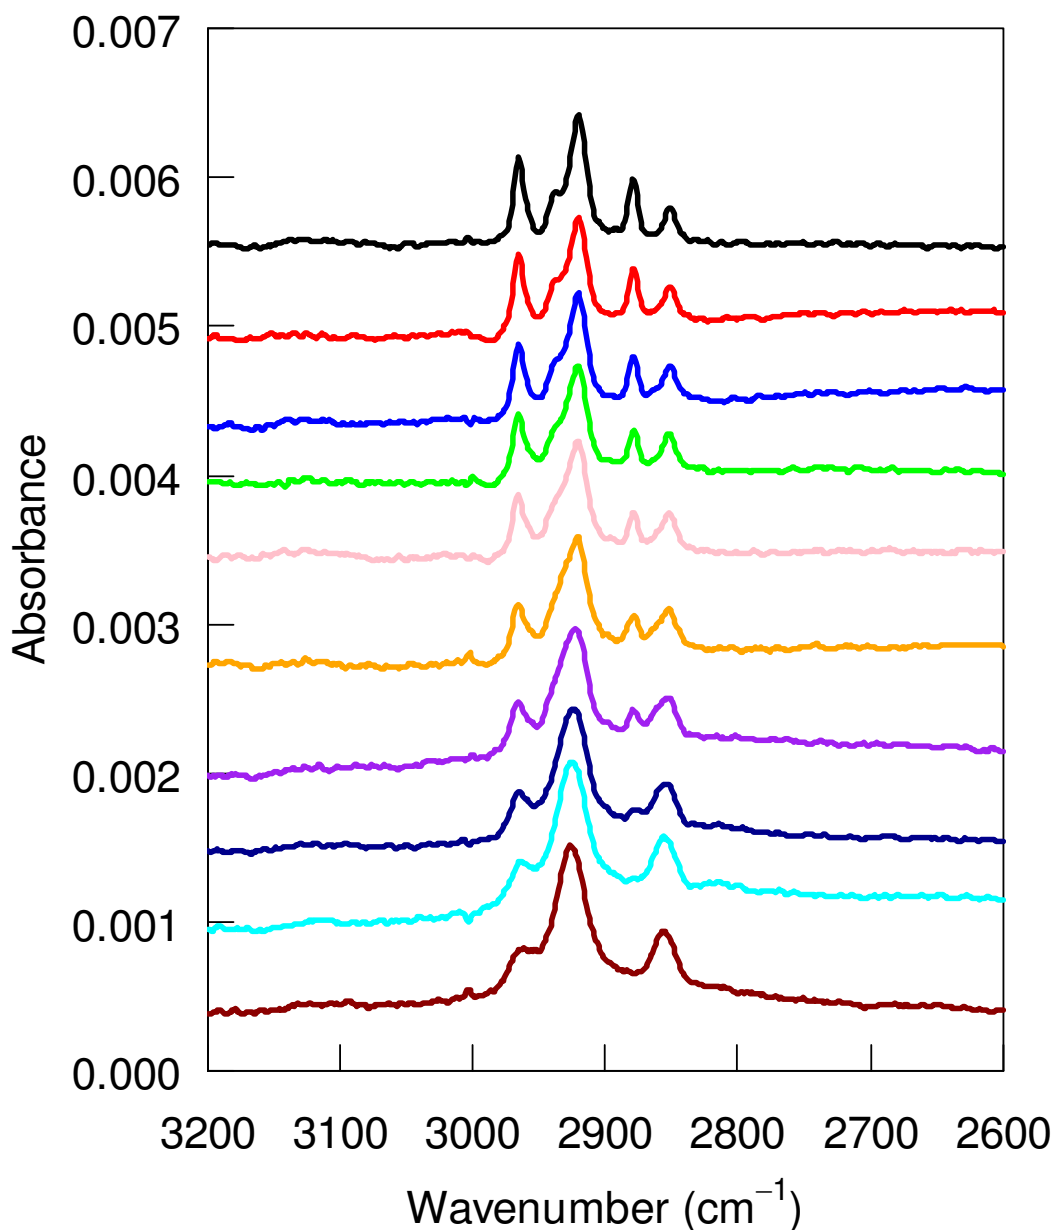

**Figure. S4.** FTIR spectra for mixed SAMs prepared in reaction mixtures with different 11-amino-1-undecanethiol ( $\text{NH}_2$ ) and 1-Dodecanethiol ratios. The areas of peaks at  $2965\text{--}2966\text{ cm}^{-1}$  assigned to the asymmetric stretching mode of methyl groups were used to determine the surface concentrations of  $\text{CH}_3$  groups. ( — )  $\text{NH}_2/\text{CH}_3=0/100$ , ( — )  $\text{NH}_2/\text{CH}_3=10/90$ , ( — )  $\text{NH}_2/\text{CH}_3=50/50$ , ( — )  $\text{NH}_2/\text{CH}_3=65/35$ , ( — )  $\text{NH}_2/\text{CH}_3=75/25$ , ( — )  $\text{NH}_2/\text{CH}_3=80/20$ , ( — )  $\text{NH}_2/\text{CH}_3=85/15$ , ( — )  $\text{NH}_2/\text{CH}_3=90/10$ , ( — )  $\text{NH}_2/\text{CH}_3=95/5$ , ( — )  $\text{NH}_2/\text{CH}_3=100/0$  in the reaction mixture for the surface preparation.

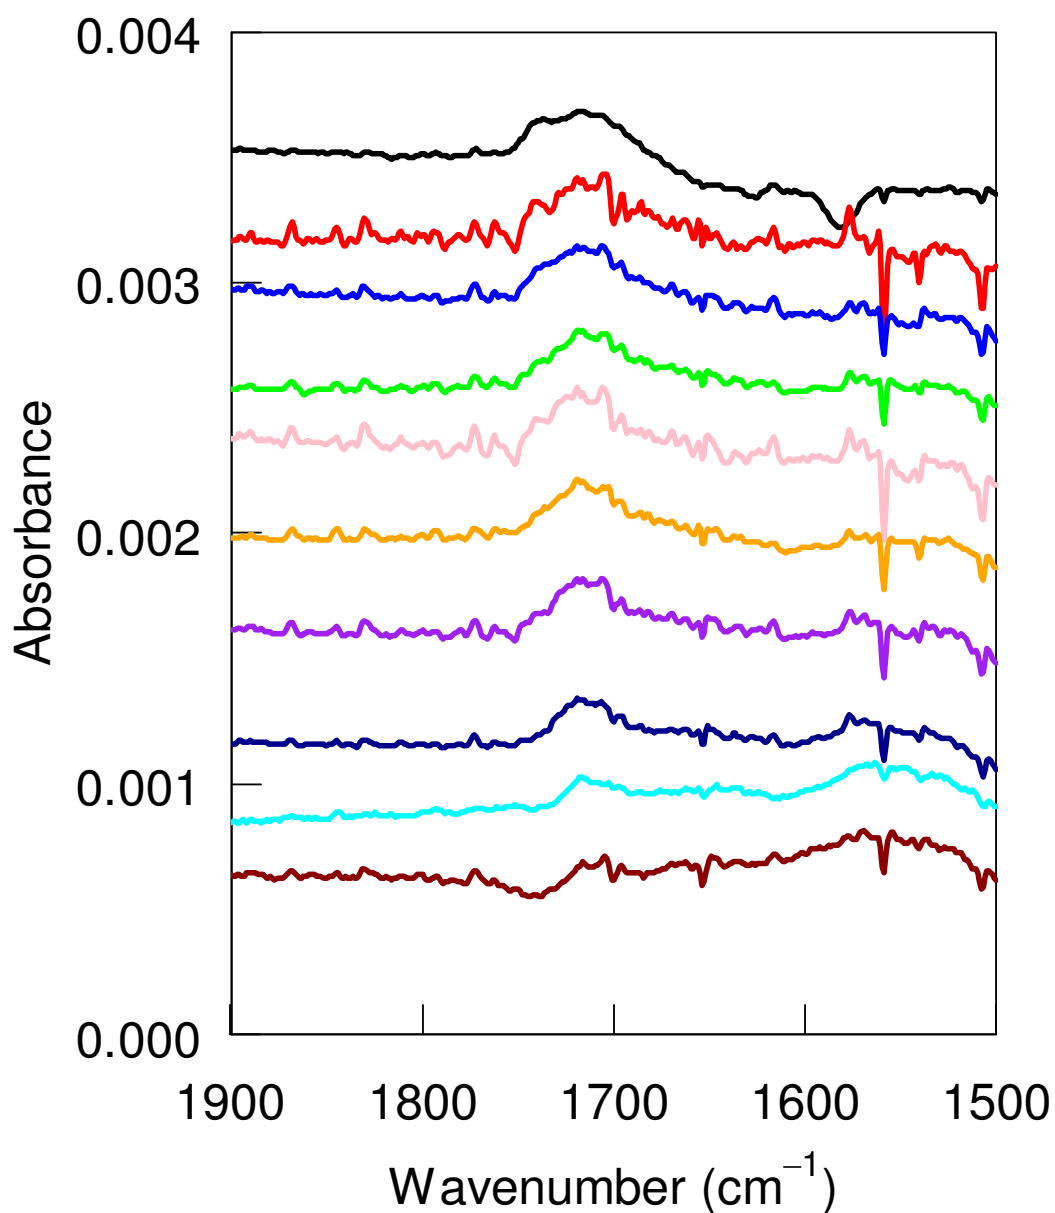

**Figure. S5.** FTIR spectra for mixed SAMs prepared in reaction mixtures with different 11-amino-1-undecanethiol ( $\text{NH}_2$ ) and 11-mercaptopundecanoic acid ratios. The areas of peaks at  $1719\text{--}1720\text{ cm}^{-1}$  for stretching mode of carboxyl groups were used to determine the surface concentrations of COOH groups. ( — )  $\text{NH}_2/\text{COOH}=0/100$ , ( — )  $\text{COOH}=5/95$ , ( — )  $\text{NH}_2/\text{COOH}=10/90$ , ( — )  $\text{NH}_2/\text{COOH}=25/75$ , ( — )  $\text{NH}_2/\text{COOH}=40/60$ , ( — )  $\text{NH}_2/\text{COOH}=50/50$ , ( — )  $\text{NH}_2/\text{COOH}=60/40$ , ( — )  $\text{NH}_2/\text{COOH}=80/20$ , ( — )  $\text{NH}_2/\text{COOH}=90/10$ , ( — )  $\text{NH}_2/\text{COOH}=100/0$  in the reaction mixture for the surface preparation.
